1 **Genome-wide analysis of focal DNA hypermethylation in *IDH*-mutant AML samples**

2

3 Elisabeth R. Wilson<sup>1</sup>, Nichole M. Helton<sup>1</sup>, Sharon E. Heath<sup>1</sup>, Robert S. Fulton<sup>3</sup>, Jacqueline E.  
4 Payton<sup>2</sup>, John S. Welch<sup>1</sup>, Matthew J. Walter<sup>1</sup>, Peter Westervelt<sup>1</sup>, John F. DiPersio<sup>1</sup>, Daniel C.  
5 Link<sup>1</sup>, Christopher A. Miller<sup>1,3</sup>, Timothy J. Ley<sup>1</sup>, and David H. Spencer<sup>1,2,3</sup>

6

7 <sup>1</sup> Department of Medicine, Division of Oncology, Section of Stem Cell Biology,

8 <sup>2</sup> Department of Pathology and Immunology,

9 <sup>3</sup> McDonnell Genome Institute,

10 Washington University, St. Louis, MO, USA

11

12 Running title: Methylation phenotype of *IDH*-mutant AML

13

14 The authors have no conflicts of interest relating to the work described in this manuscript.

15

16 \* Corresponding author

17 David H. Spencer, MD, PhD

18 Assistant Professor

19 Division of Oncology

20 Department of Medicine

21 Washington University School of Medicine

22 Campus Box 8007

23 660 South Euclid Avenue

24 St. Louis, MO. 63110

25 314-273-0739

26 dspencer@wustl.edu

27 **Abstract**

28 Recurrent mutations in *IDH1* or *IDH2* in acute myeloid leukemia (AML) are associated with  
29 increased DNA methylation, but the genome-wide patterns of this hypermethylation phenotype  
30 have not been comprehensively studied in AML samples. We analyzed whole-genome bisulfite  
31 sequencing data from 15 primary AML samples with *IDH1* or *IDH2* mutations, which identified  
32 ~4,000 focal regions that were uniquely hypermethylated vs. normal CD34+ cells. These  
33 regions had modest, but significant, hypermethylation in AMLs with biallelic *TET2* mutations,  
34 and 5-hydroxymethylation levels that were dependent on functional *TET2*, indicating that  
35 hypermethylation in these regions is caused by inhibition of TET-mediated demethylation. Focal  
36 hypermethylation in *IDH*<sup>mut</sup> AMLs occurred in regions with low methylation in normal CD34+  
37 cells, implying that DNA methylation and demethylation are active at these loci. AML samples  
38 containing *IDH* and *DNMT3A*<sup>R882</sup> mutations were significantly less hypermethylated, suggesting  
39 that methylation in these regions is mediated by *DNMT3A*. *IDH*<sup>mut</sup>-specific hypermethylation was  
40 highly enriched for enhancers that form direct interactions with genes involved in normal  
41 hematopoiesis and AML, including *MYC* and *ETV6*. These results suggest that focal  
42 hypermethylation in *IDH*-mutant AML occurs by altering the balance between DNA methylation  
43 and demethylation, and that disruption of these pathways at enhancers may contribute to AML  
44 pathogenesis.

## 45 **Introduction**

46 DNA methylation changes in acute myeloid leukemia (AML) occur because of disruptions in the  
47 balance between processes that add or remove 5-methyl groups to cytosines<sup>1,2</sup>. In both normal  
48 and malignant hematopoietic cells, *de novo* DNA methylation is catalyzed primarily by the DNA  
49 methyltransferase DNMT3A<sup>3,4</sup>, which methylates unmethylated DNA substrates. Demethylation  
50 occurs both passively after DNA synthesis in the absence of DNMT1-mediated propagation of  
51 hemi-methylated DNA, and actively via hydroxylation of 5mC by the TET family of hydroxylases  
52 with subsequent removal of modified cytosine residues. Alterations in these opposing forces  
53 result in either increased or decreased DNA methylation in AML cells compared to normal  
54 hematopoietic cells. These changes include diffuse hypomethylation across large genomic  
55 regions, as well as focal hypermethylation in CpG islands (CGIs). We recently showed that CGI  
56 hypermethylation in AML is mediated by DNMT3A and is present in nearly all AML subtypes<sup>5</sup>. In  
57 addition to these changes, specific DNA methylation patterns correlate with recurrent AML  
58 mutations that influence DNA methylation pathways. This includes the *DNMT3A*<sup>R882</sup> mutation,  
59 which impairs DNA methylation activity and results in a focal, canonical hypomethylation  
60 phenotype<sup>5</sup>.

61  
62 Mutations in *IDH1* and *IDH2* are also associated with altered DNA methylation patterns<sup>6,7</sup> that  
63 are thought to occur by disrupting active DNA demethylation. *IDH1* and *IDH2* encode metabolic  
64 enzymes not normally involved in DNA methylation, but when mutated produce 2-  
65 hydroxyglutarate (2HG)<sup>8</sup> that inhibits the TET family of enzymes<sup>9</sup> thereby reducing active  
66 demethylation. Analysis of DNA methylation in primary AML samples using array-based  
67 technologies and reduced-representation bisulfite sequencing (RBBS) has shown that DNA  
68 methylation is increased in specific genomic regions in samples with *IDH* mutations<sup>6,10</sup>. While  
69 the direct effects of these changes on gene regulation have been challenging to identify, the  
70 contribution of *IDH* mutations to leukemogenesis has been established in mouse models.

71 Expression of either *IDH1*<sup>R132H</sup> or *IDH2*<sup>R140Q</sup> blocks normal hematopoietic differentiation,  
72 promotes myeloproliferation<sup>11–13</sup>, and can result in AML transformation in the presence of  
73 cooperating mutations<sup>13,14</sup>. These studies demonstrate the contribution of mutations in *IDH1* and  
74 *IDH2* to AML development, which may occur by disrupting the balance between DNA  
75 methylation and demethylation.

76  
77 Although previous studies using targeted DNA methylation approaches have established  
78 general effects of *IDH1* and *IDH2* mutations on DNA<sup>6,7,10,15</sup>, a genome-wide analysis of  
79 methylation patterns in primary AML samples has not yet been described. It is therefore unclear  
80 whether *IDH1* vs. *IDH2* mutations manifest unique, mutation-specific methylation phenotypes,  
81 and whether these methylation changes are distinct from DNMT3A-mediated CGI  
82 hypermethylation. In addition, although *IDH* mutations are thought to cause hypermethylation  
83 via inhibition of TET enzymes, the extent of overlap in methylation phenotypes between AML  
84 samples with mutations in *IDH1/IDH2* and *TET2* remains unclear. Here, we performed a  
85 genome-wide analysis of DNA methylation in primary AML samples with recurrent mutations in  
86 *IDH1* or *IDH2* using whole-genome bisulfite sequencing (WGBS). WGBS data from normal  
87 hematopoietic cells and AML samples with *TET2* mutations and other mutational profiles were  
88 included to define the methylation phenotypes specific to *IDH* mutations, and to determine  
89 whether these patterns are present in AML samples with *TET2* mutations. We integrated these  
90 data with epigenetic modifications and three-dimensional (3D) genome architecture from  
91 primary AML samples to characterize the functional genomic elements that are affected upon  
92 disruption of the balance between DNA methylation and demethylation in AML cells.

93

## 94 **Materials and Methods**

95 *Patient samples*

96 Primary AML samples and normal hematopoietic cells for epigenetic studies were obtained from  
97 presentation AML and normal bone marrow aspirates, following informed consent using protocol  
98 (201011766) approved by the Human Research Protection Office at Washington University as  
99 described previously<sup>5</sup> (Table S1). All experiments with AML samples used total bone marrow  
100 cells after estimating the leukemic purity.

101

#### 102 *Whole genome bisulfite and oxidative bisulfite sequencing and data analysis*

103 Whole-genome bisulfite sequencing data for 38 samples were described previously<sup>5</sup>. Data for  
104 13 additional samples were generated using 50ng of DNA with the Swift Accel-NGS Methyl-Seq  
105 library preparation kit. Oxidative bisulfite sequencing libraries were prepared following treatment  
106 of 200ng of DNA with the TrueMethyl oxBS module (Cambridge Epigenetix) prior to bisulfite  
107 conversion and Swift library construction and sequencing on NovaSeq 6000 instruments (Table  
108 S1). Data were aligned to the GRCh38 human reference and processed into methylated read  
109 counts using biscuit<sup>16</sup> with default parameters. Differentially methylated regions (DMRs) were  
110 identified between AML groups using read count data via DSS<sup>17</sup> and subsequent filtering to  
111 retain regions with >10 CpGs and a difference in mean methylation of 0.2. Mutation-specific  
112 DMRs were identified using hierarchical clustering where group level mean methylation values  
113 at all identified AML DMRs were assessed for euclidean distances via 'dist' with default  
114 parameters. Clustering topology was analyzed to identify DMRs where a outlier branch  
115 represented the specified AML mutational group. Statistical analysis of differential methylation in  
116 DMRs was performed on the sum of the methylated/unmethylated counts using a Fisher's exact  
117 test. 5hmC values were obtained by subtracting the methylation ratios from OxBS data from  
118 WGBS data at all CpGs with coverage of at least 10x.

119

#### 120 *ChIP-seq for histone modifications*

121   ChIP-seq was performed using ChIPmentation<sup>18</sup> with the following antibodies: H3K27me3  
122   (9733S), and H3K27ac (8173S) from Cell Signaling Technology, and H3K4me1 (ab1012) from  
123   Abcam. Sequencing was performed on a NovaSeq 6000 (Illumina, San Diego, CA) to obtain  
124   ~50 million 2x150 bp reads. Data were analyzed via adapter trimming with trimgalore and  
125   alignment to GRCh38 using bwa mem<sup>19</sup>. Normalized coverage for visualization and analysis  
126   used the deeptools “bamCoverage” tool<sup>20</sup>, and peaks were called with MACS2<sup>21</sup>. Statistical  
127   comparisons with DESeq2<sup>22</sup> used raw fragment counts at peak summits, and visualizations  
128   were prepared with Gviz<sup>23</sup>. Superenhancer analysis was conducted using ROSE software<sup>24,25</sup>  
129   with default parameters.

130

### 131   *RNA-seq analysis*

132   RNA-seq data from AML samples were obtained from the AML TCGA study<sup>15</sup>. TPM values were  
133   obtained using kallisto<sup>26</sup> and gene counts were generated using the tximport Bioconductor  
134   package<sup>27</sup> in R with the tx2gene option set to accomplish gene-level summarization. Previously  
135   published RNA-seq data for normal CD34+ cells generated using the same procedures that  
136   were used for the AML samples<sup>28,29</sup> were obtained as raw sequencing reads from the short-  
137   read archive (GSE48846) and processed as described above.

138

### 139   *Hi-C data analysis*

140   Hi-C data were obtained from previous studies of 3D genome interactions in primary AML  
141   samples<sup>30</sup> and normal hematopoietic stem/progenitors<sup>31</sup>. All libraries were generated using Mbol  
142   digestion prior to proximity ligation and data were analyzed using the juicer pipeline<sup>32</sup>. Loops  
143   were identified with HICCUPS and were analyzed using bedtools<sup>33</sup> to identify overlap with genes  
144   and putative enhancers. Visualizations used the GenomicInteractions and Gviz R packages<sup>23</sup>.

145

## 146   **Results**

147 *Primary AML samples with IDH1 or IDH2 mutations are focally hypermethylated at regions with*  
148 *low methylation in normal hematopoietic cells*

149 We performed WGBS using 15 primary bone marrow aspirate samples from AML patients with  
150 canonical *IDH* mutations, including seven with *IDH1*<sup>R132C/G</sup>, seven with *IDH2*<sup>R140Q</sup>, and one with  
151 an *IDH2*<sup>R172K</sup> allele (referred to hereafter as *IDH*<sup>mut</sup>). These data were analyzed with WGBS data  
152 from 36 other primary AML samples representing eight mutational categories, including five with  
153 biallelic loss-of-function mutations in *TET2*, and primary CD34+ cells from six healthy adult bone  
154 marrow donors<sup>5</sup>. All AML samples were previously sequenced using whole genome and/or  
155 whole exome sequencing<sup>15,34</sup>, which confirmed that the mutations affecting DNA methylation  
156 were present in the dominant leukemic clone at presentation (Figure 1A). Importantly, the *IDH*<sup>mut</sup>  
157 AML samples lacked mutations in *DNMT3A* and *TET2* to minimize effects of other mutations on  
158 DNA methylation patterns. WGBS produced a mean of 12x coverage (range: 4-16) for at least  
159 28 million CpGs in the human reference sequence across all samples. *IDH*<sup>mut</sup> AML samples had  
160 genome-wide methylation levels similar to all other samples (Figure 1B), but were more  
161 methylated at CGIs compared with normal CD34+ cells and AMLs with *DNMT3A*<sup>R882</sup> mutations,  
162 which have diminished CGI hypermethylation (*IDH*<sup>mut</sup> vs. CD34+ cells  $P < 0.0001$ ; *IDH*<sup>mut</sup> vs.  
163 *DNMT3A*<sup>R882</sup>  $P < 0.0001$ ; Figure 1C). CGI methylation levels were similar between *IDH*<sup>mut</sup> AML  
164 samples and AMLs with wild type *IDH1* and *IDH2* (mean CGI methylation of *IDH*<sup>mut</sup> cases =  
165 0.35, mean of all other groups = 0.33;  $P = 0.1$ ; Figure 1C), indicating that *IDH* mutations do not  
166 result in an exaggerated CGI hypermethylation phenotype.

167  
168 Differential methylation analysis was performed using established methods<sup>17</sup> for eight mutation-  
169 defined AML groups vs. normal CD34+ cells. This identified a mean of 4,689 (1,114-8,386)  
170 Differentially Methylated Regions (DMRs) across the eight categories (minimum methylation  
171 difference of 0.2,  $FDR < 0.05$ ); of these, between 6% and 97% were hypermethylated in the AML  
172 samples vs. CD34+ cells (see Figure 1D). AMLs with *DNMT3A*<sup>R882</sup> had the most

173 hypomethylated DMRs (97% of 5,747 DMRs), whereas *IDH*<sup>mut</sup> AML samples had the most  
174 hypermethylated DMRs, with 99% of the 6,960 identified regions having at least 0.2 higher  
175 mean methylation than CD34+ cells. *TET2*-mutant samples were also hypermethylated, but at  
176 fewer loci, with 74% of the 2,991 identified DMRs having higher methylation. The fewest DMRs  
177 were identified in samples with *IDH1* or *IDH2* mutations and *DNMT3A*<sup>R882</sup>, which is consistent  
178 with previous studies suggesting that AML samples with both mutations have abrogated  
179 methylation phenotypes<sup>10</sup>. Analysis of DMRs identified in *IDH*<sup>mut</sup> samples demonstrated that  
180 29% were associated with promoters and 43% occurred in CGIs, which was similar to the  
181 frequencies observed for commonly hypermethylated DMRs in other AML subtypes (Figure  
182 S1A). Interestingly, although *IDH* mutations are thought to lead to hypermethylation by inhibiting  
183 active demethylation, most *IDH*<sup>mut</sup>-specific DMRs had low methylation in normal hematopoietic  
184 cells. For example, 72% of the *IDH*<sup>mut</sup> DMRs had a mean methylation <0.3 in both CD34+ cells  
185 (Figure S1B) and more mature myeloid cell populations (Figure S1C), suggesting that DNA  
186 methylation pathways must be active in these regions to achieve the level of hypermethylated  
187 observed in *IDH*<sup>mut</sup> AML samples.

188  
189 *IDH*<sup>mut</sup>-specific methylation changes are distinct from AML-associated CGI hypermethylation  
190 and are influenced by *IDH* mutation type

191 Because AML patients with *IDH1* vs. *IDH2* mutations have distinct clinical and molecular  
192 phenotypes<sup>35-39</sup> we next sought to identify methylation changes uniquely associated with *IDH1*  
193 and/or *IDH2* mutations and to determine whether these patterns are distinct from AML-  
194 associated CGI hypermethylation (Figure 2A). Thus, we performed hierarchical clustering of  
195 mean methylation values for either *IDH1*<sup>mut</sup> or *IDH2*<sup>mut</sup> and *IDH*<sup>wt</sup> AML samples at DMRs  
196 identified above, and used the clustering topology to identify regions where the single outlier  
197 branch represented the *IDH* mutant AML samples (Figure 2B, see Methods). Samples with  
198 *TET2* and/or *DNMT3A*<sup>R882</sup> mutations were excluded, since they may share methylation changes



199 with  $IDH^{mut}$  samples, or lack CGI hypermethylation<sup>5,6</sup>, respectively. This approach identified  
200 3,928  $IDH1^{mut}$ -specific and 1,821  $IDH2^{mut}$ -specific DMRs, of which 90% and 79% were  
201 hypermethylated with respect to normal CD34+ cells, respectively (see Figure 2C-E). Consistent  
202 with the analysis above, most DMRs displayed low methylation in normal cells, with 55% of  
203  $IDH1^{mut}$ -specific and 71% of  $IDH2^{mut}$ -specific loci having a methylation level <0.3 in CD34+ cells  
204 (Figure 2C-E) and mature myeloid cells (Figure S1D). There was extensive overlap between the  
205  $IDH$  mutation-specific DMRs (94%, 5,403 of 5,749 total DMRs), and AML samples with either  
206 mutation were hypermethylated at both DMR sets (Figure 2E). However, hierarchical clustering  
207 demonstrated considerable variability in methylation levels between the  $IDH1^{mut}$  and  $IDH2^{mut}$   
208 samples (Figure 2F). This was most striking for the  $IDH2^{mut}$  samples, which included three  
209 AMLs with lower methylation at the  $IDH2^{mut}$ -specific DMRs (Figure 2F-G).  $IDH2^{mut}$  AML samples  
210 were less methylated at the combined set of  $IDH1^{mut}$ -specific and  $IDH2^{mut}$ -specific DMR loci  
211 ( $IDH2^{mut}$ = 0.54 vs.  $IDH1^{mut}$ =0.70; p-value= 0.04), although they remained hypermethylated  
212 relative to CD34+ cells (Figure 2G). This difference was not related to mutant  $IDH$  allele  
213 abundance (all samples had VAFs >30%, Table S1), and did not correlate with other recurrent  
214 mutations, including *NPM1c* (4 in  $IDH1^{mut}$  and 3 in  $IDH2^{mut}$  samples, Figure 2F).

215  
216 To determine whether  $IDH^{mut}$ -specific hypermethylation is similar to the canonical CGI  
217 hypermethylation seen in other AML samples, we analyzed the CpG content and genomic  
218 features of the  $IDH^{mut}$ -specific DMRs. Interestingly, the CpG density and overlap with genomic  
219 annotations was markedly different for both  $IDH1^{mut}$ -specific and  $IDH2^{mut}$ -specific DMRs  
220 compared to regions with AML-associated CGI hypermethylation. For example, the combined  
221 set of  $IDH^{mut}$ -specific DMRs displayed significantly lower CpG density (mean CpG density of  
222 0.89 vs. 1.26; P<0.0001) and less overlap with annotated CGIs (23% vs. 54%) compared to  
223 4,573 commonly hypermethylated regions identified in at least 2 other AML mutation categories  
224 (Figure 2H-I). Promoter regions were also underrepresented among the  $IDH^{mut}$ -specific DMRs

225 (21% vs 31%; see Figure 2H), consistent with depletion of promoter-associated CGIs among  
226 *IDH*<sup>mut</sup>-specific DMRs, further suggesting that *IDH*-associated hypermethylation is distinct from  
227 AML-associated CGI hypermethylation.

228  
229 *Hypermethylation in TET2<sup>mut</sup> AMLs overlaps with IDH<sup>mut</sup>-specific hypermethylation, but does not*  
230 *phenocopy the extent of methylation changes*

231 We next determined whether AML samples with biallelic loss-of-function mutations in *TET2*  
232 shared similar genome-wide patterns of hypermethylation with *IDH*<sup>mut</sup> AMLs. Initial comparison  
233 of the *TET2*<sup>mut</sup> AMLs vs. normal CD34+ cells yielded fewer DMRs and a lower proportion of  
234 hypermethylated regions compared to *IDH*<sup>mut</sup> samples (2,512 vs. 6,523 DMRs, and 78% vs 99%  
235 hypermethylated regions, respectively), consistent with previous reports that inactivation of  
236 *TET2* has a less profound effect on DNA methylation<sup>6,10</sup>. Identification of *TET2*<sup>mut</sup>-specific DMRs  
237 using the clustering approach described above (with *IDH*<sup>mut</sup> and *DNMT3A*<sup>R882</sup> AMLs excluded  
238 from the analysis) produced only 51 *TET2*<sup>mut</sup>-specific DMRs, confirming that these AMLs lack a  
239 strong hypermethylation phenotype (Figure 3A). Although many DMRs were hypermethylated  
240 relative to CD34+ cells (31 of 51), the fraction was significantly less than in either *IDH1*<sup>mut</sup> or  
241 *IDH2*<sup>mut</sup> AMLs (60% vs 91% and 73%, respectively). *TET2*<sup>mut</sup>-specific DMRs were also not  
242 enriched for either CGIs or promoters, compared to the set of commonly hypermethylated  
243 DMRs (17% of *TET2* DMRs vs. 54% generic DMRs; 11% of *TET2* DMRs vs. 31% generic  
244 DMRs; see Figure S2A-B), suggesting these regions are unlikely to reflect CGI  
245 hypermethylation.

246  
247 To investigate the interaction between *IDH* mutations and *TET2*-mediated demethylation, we  
248 compared *TET2*<sup>mut</sup>-specific and *IDH*<sup>mut</sup>-specific DMRs, and performed oxidative bisulfite  
249 sequencing<sup>40</sup> to measure 5-hydroxymethylation (5hmC) in samples with and without biallelic  
250 inactivating *TET2* mutations. This analysis showed that 82% (42 of 51) of the *TET2*<sup>mut</sup>-specific

251 DMRs overlapped an *IDH*<sup>mut</sup>-specific hypermethylated region (Figure 3B). Methylation in  
252 *TET2*<sup>mut</sup> AMLs at the 4008 *IDH*<sup>mut</sup>-specific DMRs was also significantly increased compared to  
253 CD34+ cells (mean methylation of 0.38 vs. 0.31; 61% of DMRs with increased methylation via  
254 Fisher's exact test with  $q < 0.05$ ; Figure 3C-D). We next analyzed levels of 5hmC at *IDH*<sup>mut</sup> DMRs  
255 using paired oxidative and standard whole-genome bisulfite sequencing (oxWGBS and WGBS)  
256 of primary AML samples with (N=3) and without (N=1) *TET2* mutations (Figure S2C).  
257 Subtraction of oxWGBS from WGBS data for CpGs with >10x coverage demonstrated low  
258 levels of 5hmC across the genomes of these samples (mean: 0.51-0.71% in *TET2*<sup>mut</sup>, 1.35% in  
259 *TET2*<sup>wt</sup>; Figure S2D), and identifiable peaks at selected loci (Figure S2E). *IDH*<sup>mut</sup> DMRs had  
260 higher levels of 5hmC than in either constitutively methylated heterochromatin or regions with  
261 CGI hypermethylation, and 5hmC levels were lower in all three of these regions in *TET2*<sup>mut</sup> AML  
262 samples (Figure 3E, Figure S2F), indicating that 5hmC in these regions is dependent on TET2  
263 activity.

264

#### 265 *DNA hypermethylation in IDH<sup>mut</sup> AML cells requires DNMT3A*

266 To assess whether *de novo* DNA methylation by DNMT3A contributes to *IDH*<sup>mut</sup>-associated  
267 hypermethylation, we analyzed methylation levels at *IDH*<sup>mut</sup>-specific DMRs in seven AML  
268 samples with co-occurring *IDH1* (N=5) or *IDH2* (N=2) and *DNMT3A*<sup>R882</sup> mutations, which have a  
269 dominant negative phenotype and a more severe hypomethylation than other *DNMT3A*  
270 mutations<sup>4</sup>. Interestingly, although *DNMT3A*<sup>R882</sup>/*IDH*<sup>mut</sup> AMLs were still hypermethylated at  
271 *IDH*<sup>mut</sup>-specific DMRs, the degree of hypermethylation was diminished, with 51% of these  
272 regions having significantly lower DNA methylation levels than samples with *IDH* mutations  
273 alone (Figures 4A-C, S3A). Similar findings were observed in 7 additional *DNMT3A*<sup>R882</sup>/*IDH*<sup>mut</sup>  
274 AML samples using methylation array data from the TCGA AML study<sup>15</sup> (Figure S3B). To further  
275 characterize the extent of this interaction at regions known to be methylated by DNMT3A, we  
276 analyzed DNA methylation levels in *DNMT3A*<sup>R882</sup>/*IDH*<sup>mut</sup> AML samples at hypomethylated DMRs

277 in AMLs with the *DNMT3A*<sup>R882</sup> allele<sup>5</sup>. Surprisingly, these regions remained nearly fully  
278 methylated in the *DNMT3A*<sup>R882</sup>/*IDH*<sup>mut</sup> double mutant samples, with 93% of the regions having  
279 significantly higher methylation than AMLs with *DNMT3A*<sup>R882</sup> alone (Figures 4D-F, Figure S3C).  
280 Similar findings were observed in the array-based methylation data from the TCGA AML study<sup>15</sup>  
281 (Figure S3D), further implying that DNMT3A-mediated methylation and TET-mediated  
282 demethylation occur at the same places in the genome.

283

#### 284 *IDH*<sup>mut</sup>-specific hypermethylated DMRs are enriched for enhancers

285 We next asked whether these *IDH*<sup>mut</sup>-specific DMRs were associated with certain chromatin  
286 states. Annotation of these DMRs with chromatin states in CD34+ cells<sup>41</sup> demonstrated that  
287 44% occurred the enhancer chromatin state, which was a 2-fold enrichment over regions  
288 commonly hypermethylated (Figure 5A). Similar analysis performed on DMRs identified in other  
289 AML subtypes showed a different distribution of chromatin states (Figure S4A-C). We further  
290 defined this association using ChIP-seq peaks for enhancer-associated H3K27ac and H3K4me1  
291 modifications from 16 primary AML samples, including 14 *IDH*<sup>wt</sup> and 2 *IDH*<sup>mut</sup>. Analysis defined  
292 44,762 and 6,917 consensus peaks for H3K27ac and H3K4me1, respectively, which along with  
293 H3K27me3 ChIP-seq data from 9 AML patients were used to identify active, poised, and weak  
294 enhancer loci. Analysis of the *IDH*<sup>mut</sup> DMRs showed that 47% overlapped an active enhancer,  
295 compared to 3% and 1% that overlapped poised and weak regions, respectively (Figures 5B-D).  
296 In comparison, commonly hypermethylated regions showed less overlap with active enhancers  
297 (13% of DMRs) and greater intersection with repressive H3K27me3 marks (Figure 5D). We  
298 analyzed *IDH*<sup>mut</sup>-specific DMRs for transcription factor (TF) binding motifs, which identified  
299 binding sites for hematopoietic-associated TFs, including *SPI1*, *RUNX1*, and *MYC* (Figure 5E),  
300 further supporting the occurrence of *IDH*<sup>mut</sup>-specific hypermethylation at regions with potential  
301 regulatory activity. However, quantitative analysis of H3K27ac signal over these regions in  
302 samples with and without *IDH* mutations did not identify appreciable differences in wild type vs.

303 mutant samples (p-value=0.24, Figure 5F), suggesting that hypermethylation does not modify  
304 H3K27ac levels within these regions.  
305  
306 *IDH<sup>mut</sup>-specific DMRs occur in enhancers that form direct interactions with highly expressed*  
307 *genes in AML cells*  
308 We next asked whether enhancers with *IDH<sup>mut</sup>* DMRs could be involved in controlling the  
309 expression of genes relevant for AML pathogenesis. To directly link these enhancers to their  
310 target genes, we analyzed three-dimensional (3D) genome interactions generated using *in situ*  
311 HiC from both normal CD34+ cells<sup>31</sup> and 3 primary AML samples<sup>30</sup> (all wild-type for *DNMT3A*,  
312 *IDH1*, *IDH2*, and *TET2*). This analysis demonstrated that 25% (1047/4008) of all *IDH<sup>mut</sup>*-specific  
313 DMRs and 32% (322/1021) of the DMRs in putative enhancers overlapped the ‘loop anchor’ of a  
314 genome interaction (Figure 6A, Figure S5A). *IDH<sup>mut</sup>* DMRs in these loop anchors were highly  
315 enriched in ‘superenhancers’, with between 37 and 39% of superenhancers defined in 3 primary  
316 *IDH<sup>mut</sup>* AML samples containing at least one *IDH<sup>mut</sup>*-specific DMR (Figure 6B-C, Figure S5B-C).  
317 We next analyzed gene expression in 750 genes with promoters that formed 3D interactions  
318 with *IDH<sup>mut</sup>*-specific DMRs using RNA-seq data from 179 AML samples from the TCGA AML  
319 study. This showed that the genes linked to *IDH<sup>mut</sup>*-specific DMRs were highly expressed, with  
320 68% of these genes ranked in the top 25<sup>th</sup> percentile of gene expression (Figure 6D, Figure  
321 S5D). Further analysis of 3D genome interactions containing *IDH<sup>mut</sup>*-specific DMRs identified  
322 known and novel enhancers of genes important in hematopoiesis and AML, including an  
323 enhancer of *MYC*<sup>42-44</sup> (Figure 6E), and previously unreported putative enhancers that form  
324 interactions with *ETV6* (Figure 6F), *DOT1L*, and *SRSF3* (Figure S5E-F). Although we did not  
325 observe significant changes in expression of these genes between *IDH<sup>mut</sup>* and *IDH<sup>wt</sup>* AMLs, their  
326 high expression in AML samples and CD34+ cells was consistent with the enrichment of *IDH<sup>mut</sup>*-  
327 specific DMRs in enhancers of active genes (Figure 6D-F).  
328

## 329 Discussion

330 Recurrent gain-of-function *IDH1* and *IDH2* mutations are known to increase DNA methylation,  
331 though the extent and functional consequences of these changes have not been clearly defined.  
332 We used whole-genome bisulfite sequencing of primary AML samples to demonstrate that the  
333 effects of *IDH* mutations on methylation do not manifest as diffuse changes across the genome,  
334 but instead occur in thousands of focal regions that are uniquely hypermethylated compared to  
335 both normal CD34+ cells and other AML samples. These regions had lower CpG density and  
336 fewer CGIs than loci that are commonly hypermethylated in AML, suggesting that mechanisms  
337 of *IDH*<sup>mut</sup>-associated methylation changes are distinct from 'traditional' CGI hypermethylation  
338 associated with AML. The *IDH2*-mutant AML samples in our dataset had less pronounced  
339 hypermethylation than those with *IDH1* mutations, but both were hypermethylated at a highly  
340 overlapping set of loci. AMLs with biallelic inactivating mutations in *TET2* had a far less dramatic  
341 methylation phenotype, though many *IDH*<sup>mut</sup>-specific DMRs were significantly hypermethylated  
342 in *TET2*<sup>mut</sup> AML samples. Further, oxidative bisulfite sequencing demonstrated increased levels  
343 of 5hmC in these regions, which was absent in the *TET2*<sup>mut</sup> AML samples, providing additional  
344 evidence in primary AML samples that both *IDH* and *TET2* mutations cause increased DNA  
345 methylation by impairing the TET-mediated DNA demethylation pathway. Regions with *IDH*<sup>mut</sup>-  
346 specific hypermethylation were enriched for active enhancers, many of which formed direct  
347 interactions with genes that are highly expressed in AML cells, including regulatory sequences  
348 that interact with the promoters of *MYC* and *ETV6*. Although the increased methylation at these  
349 loci was not associated with repressed chromatin or lower gene expression in *IDH*<sup>mut</sup> AML  
350 samples, this finding demonstrates that *IDH*<sup>mut</sup>-associated hypermethylation affects the  
351 regulatory sequences of genes that may contribute to AML pathogenesis.

352

353 This study adds new context to the dynamics of *de novo* DNA methylation and active  
354 demethylation pathways in normal hematopoietic cells and in AML. The fact that *IDH*<sup>mut</sup>-

355 associated hypermethylation occurs at regions with low levels of DNA methylation in normal  
356 CD34+ cells means that *de novo* DNA methylation and TET-mediated demethylation can both  
357 be active in these regions, despite their low steady-state methylation levels. This is supported  
358 by the observation that AML samples with co-occurring *IDH* and *DNMT3A*<sup>R882</sup> mutations show  
359 significantly attenuated hypermethylation, and that there are appreciable levels of 5hmC in  
360 *IDH*<sup>mut</sup>-specific DMRs, which is produced from 5mC as a substrate. Remodeling of DNA  
361 methylation by these processes in specific regions has been reported previously in studies of  
362 embryonic stem cells, which have shown that methylation and active demethylation are in  
363 equilibrium at many loci<sup>1,2</sup>, and may be maintained by the occupancy of methylation and  
364 demethylation complexes<sup>45</sup>. Our analysis suggests this equilibrium exists in normal CD34+ cells  
365 and is disrupted in the presence of mutant *IDH* alleles, leaving *de novo* DNA methylation  
366 unopposed. The focal nature of *IDH*<sup>mut</sup>-associated hypermethylation implies that activity (or  
367 occupancy) of DNMT3A and TET enzymes may be ‘concentrated’ in specific genomic regions.  
368 The genomic or epigenetic features<sup>46</sup> directing this activity remain unclear<sup>46</sup>, but the enrichment of  
369 *IDH*<sup>mut</sup> DMRs in active enhancers suggests that components of active chromatin may recruit  
370 methylation and demethylation machinery. The convergence of these processes at enhancers  
371 could provide clues as to why mutations with opposite effects on DNA methylation both  
372 contribute to AML development via dysregulation of common target genes.

373  
374 Our analysis of 3D genome interactions involving *IDH*<sup>mut</sup>-specific DMRs found that these  
375 sequences directly interact with genes that are highly expressed in hematopoiesis and AML  
376 (e.g., *MYC* and *ETV6*). Contrary to the canonical relationship between DNA methylation and  
377 activity, hypermethylation in the *IDH*<sup>mut</sup> AML samples does not appear to repress either the  
378 enhancer elements or expression of their target genes. Other regulatory factors may therefore  
379 be dominant to DNA methylation at these loci, and result in persistently high gene expression. It  
380 could also be that regions of active chromatin, such as enhancers (and superenhancers), have

381 high rates of methylation turnover and are therefore susceptible to perturbations in methylation  
382 and demethylation<sup>1,2</sup>. Focal hypermethylation may occur in DNA elements bound by factors that  
383 contribute to 'fine-tuning' of these enhancers in specific cellular or developmental contexts, but  
384 that do not drive activity in AML cells. Additional studies will be necessary to understand  
385 whether hypermethylation of these enhancer elements is a consequence of decreased  
386 occupancy of these modulating factors<sup>47</sup>, or whether it directly prevents proper regulation in  
387 ways that contribute to AML development.  
388



389 **Acknowledgements**

390 This work was supported by the National Cancer Institute (K08CA190815) and The Cancer  
391 Research Foundation Young Investigator Award to D.H.S. Support for procurement, annotation,  
392 and sequencing of human samples was provided by the Genomics of AML Program Project  
393 (P01CA101937, to Dr. Ley) and the Specialized Program of Research Excellence in AML  
394 (P50CA171963, to Dr. Link) from the NCI. Sequencing was performed by the McDonnell  
395 Genome Institute at Washington University in St. Louis.

## 396 **References**

- 397 1. Charlton, J. *et al.* TETs compete with DNMT3 activity in pluripotent cells at thousands of  
398 methylated somatic enhancers. *Nat Genet* **52**, 819–827 (2020).
- 399 2. Ginno, P. A. *et al.* A genome-scale map of DNA methylation turnover identifies site-specific  
400 dependencies of DNMT and TET activity. *Nat Commun* **11**, 2680 (2020).
- 401 3. Challen, G. A. *et al.* Dnmt3a is essential for hematopoietic stem cell differentiation. *Nat Genet*  
402 **44**, 23 (2012).
- 403 4. Russler-Germain, D. A. *et al.* The R882H DNMT3A Mutation Associated with AML  
404 Dominantly Inhibits Wild-Type DNMT3A by Blocking Its Ability to Form Active Tetramers.  
405 *Cancer Cell* **25**, 442–454 (2014).
- 406 5. Spencer, D. H. *et al.* CpG Island Hypermethylation Mediated by DNMT3A Is a Consequence  
407 of AML Progression. *Cell* **168**, 801-816.e13 (2017).
- 408 6. Figueroa, M. E. *et al.* Leukemic IDH1 and IDH2 Mutations Result in a Hypermethylation  
409 Phenotype, Disrupt TET2 Function, and Impair Hematopoietic Differentiation. *Cancer Cell* **18**,  
410 553–567 (2010).
- 411 7. Akalin, A. *et al.* Base-Pair Resolution DNA Methylation Sequencing Reveals Profoundly  
412 Divergent Epigenetic Landscapes in Acute Myeloid Leukemia. *Plos Genet* **8**, e1002781 (2012).
- 413 8. Losman, J.-A. *et al.* (R)-2-Hydroxyglutarate Is Sufficient to Promote Leukemogenesis and Its  
414 Effects Are Reversible. *Science* **339**, 1621–1625 (2013).
- 415 9. Xu, W. *et al.* Oncometabolite 2-Hydroxyglutarate Is a Competitive Inhibitor of  $\alpha$ -Ketoglutarate-  
416 Dependent Dioxygenases. *Cancer Cell* **19**, 17–30 (2011).
- 417 10. Glass, J. L. *et al.* Epigenetic Identity in AML Depends on Disruption of Nonpromoter  
418 Regulatory Elements and Is Affected by Antagonistic Effects of Mutations in Epigenetic  
419 Modifiers. *Cancer Discov* **7**, 868–883 (2017).
- 420 11. Moran-Crusio, K. *et al.* Tet2 Loss Leads to Increased Hematopoietic Stem Cell Self-  
421 Renewal and Myeloid Transformation. *Cancer Cell* **20**, 11–24 (2011).
- 422 12. Sasaki, M. *et al.* IDH1(R132H) mutation increases murine haematopoietic progenitors and  
423 alters epigenetics. *Nature* **488**, 656 (2012).
- 424 13. Kats, L. M. *et al.* Proto-Oncogenic Role of Mutant IDH2 in Leukemia Initiation and  
425 Maintenance. *Cell Stem Cell* **14**, 329–341 (2014).
- 426 14. Yoshimi, A. *et al.* Coordinated alterations in RNA splicing and epigenetic regulation drive  
427 leukaemogenesis. *Nature* **574**, 273–277 (2019).
- 428 15. Ley, T. J. *et al.* Genomic and Epigenomic Landscapes of Adult De Novo Acute Myeloid  
429 Leukemia. *New Engl J Medicine* **368**, 2059–2074 (2013).

- 430 16. GitHub - huishenlab/biscuit: BISulfite-seq CUI Toolkit. <https://github.com/huishenlab/biscuit>  
431 (n.d.).
- 432 17. Feng, H., Conneely, K. N. & Wu, H. A Bayesian hierarchical model to detect differentially  
433 methylated loci from single nucleotide resolution sequencing data. *Nucleic Acids Res* **42**, e69–  
434 e69 (2014).
- 435 18. Schmidl, C., Rendeiro, A. F., Sheffield, N. C. & Bock, C. ChIPmentation: fast, robust, low-  
436 input ChIP-seq for histones and transcription factors. *Nat Methods* **12**, 963–965 (2015).
- 437 19. Li, H. Aligning sequence reads, clone sequences and assembly contigs with BWA-MEM.  
438 (2013).
- 439 20. Ramírez, F. *et al.* deepTools2: a next generation web server for deep-sequencing data  
440 analysis. *Nucleic Acids Res* **44**, W160–W165 (2016).
- 441 21. Zhang, Y. *et al.* Model-based Analysis of ChIP-Seq (MACS). *Genome Biol* **9**, R137 (2008).
- 442 22. Love, M. I., Huber, W. & Anders, S. Moderated estimation of fold change and dispersion for  
443 RNA-seq data with DESeq2. *Genome Biol* **15**, 550 (2014).
- 444 23. Hahne, F. & Ivanek, R. Methods in Molecular Biology. *Methods Mol Biology Clifton N J*  
445 **1418**, 335–351 (2016).
- 446 24. Lovén, J. *et al.* Selective Inhibition of Tumor Oncogenes by Disruption of Super-Enhancers.  
447 *Cell* **153**, 320–334 (2013).
- 448 25. Whyte, W. A. *et al.* Master Transcription Factors and Mediator Establish Super-Enhancers  
449 at Key Cell Identity Genes. *Cell* **153**, 307–319 (2013).
- 450 26. Bray, N. L., Pimentel, H., Melsted, P. & Pachter, L. Near-optimal probabilistic RNA-seq  
451 quantification. *Nat Biotechnol* **34**, 525–527 (2016).
- 452 27. Soneson, C., Love, M. I. & Robinson, M. D. Differential analyses for RNA-seq: transcript-  
453 level estimates improve gene-level inferences. *F1000research* **4**, 1521 (2016).
- 454 28. Pabst, C. *et al.* GPR56 identifies primary human acute myeloid leukemia cells with high  
455 repopulating potential in vivo. *Blood* **127**, 2018–2027 (2016).
- 456 29. MacRae, T. *et al.* RNA-Seq Reveals Spliceosome and Proteasome Genes as Most  
457 Consistent Transcripts in Human Cancer Cells. *Plos One* **8**, e72884 (2013).
- 458 30. Ghasemi, R., Struthers, H., Wilson, E. R. & Spencer, D. H. Contribution of CTCF binding to  
459 transcriptional activity at the HOXA locus in NPM1-mutant AML cells. *Leukemia* 1–13 (2020)  
460 doi:10.1038/s41375-020-0856-3.
- 461 31. Zhang, X. *et al.* Large DNA Methylation Nadirs Anchor Chromatin Loops Maintaining  
462 Hematopoietic Stem Cell Identity. *Mol Cell* **78**, 506-521.e6 (2020).

- 463 32. Durand, N. C. *et al.* Juicer Provides a One-Click System for Analyzing Loop-Resolution Hi-C  
464 Experiments. *Cell Syst* **3**, 95–98 (2016).
- 465 33. Quinlan, A. R. & Hall, I. M. BEDTools: a flexible suite of utilities for comparing genomic  
466 features. *Bioinformatics* **26**, 841–842 (2010).
- 467 34. Klco, J. M. *et al.* Association Between Mutation Clearance After Induction Therapy and  
468 Outcomes in Acute Myeloid Leukemia. *Jama* **314**, 811–822 (2015).
- 469 35. Paschka, P. *et al.* IDH1 and IDH2 Mutations Are Frequent Genetic Alterations in Acute  
470 Myeloid Leukemia and Confer Adverse Prognosis in Cytogenetically Normal Acute Myeloid  
471 Leukemia With NPM1 Mutation Without FLT3 Internal Tandem Duplication. *J Clin Oncol* **28**,  
472 3636–3643 (2010).
- 473 36. Marcucci, G. *et al.* IDH1 and IDH2 Gene Mutations Identify Novel Molecular Subsets Within  
474 De Novo Cytogenetically Normal Acute Myeloid Leukemia: A Cancer and Leukemia Group B  
475 Study. *J Clin Oncol* **28**, 2348–2355 (2010).
- 476 37. Tefferi, A. *et al.* IDH1 and IDH2 mutation studies in 1473 patients with chronic-, fibrotic- or  
477 blast-phase essential thrombocythemia, polycythemia vera or myelofibrosis. *Leukemia* **24**,  
478 1302–1309 (2010).
- 479 38. Patel, K. P. *et al.* Acute Myeloid Leukemia With IDH1 or IDH2 Mutation Frequency and  
480 Clinicopathologic Features. *Am J Clin Pathol* **135**, 35–45 (2011).
- 481 39. Kattih, B. *et al.* IDH1/2 mutations in acute myeloid leukemia patients and risk of coronary  
482 artery disease and cardiac dysfunction—a retrospective propensity score analysis. *Leukemia* 1–  
483 16 (2020) doi:10.1038/s41375-020-01043-x.
- 484 40. Kernaleguen, M. *et al.* Epigenome Editing, Methods and Protocols. *Methods Mol Biology*  
485 **1767**, 311–349 (2018).
- 486 41. Ernst, J. & Kellis, M. Chromatin-state discovery and genome annotation with ChromHMM.  
487 *Nat Protoc* **12**, 2478–2492 (2017).
- 488 42. Shi, J. *et al.* Role of SWI/SNF in acute leukemia maintenance and enhancer-mediated Myc  
489 regulation. *Gene Dev* **27**, 2648–2662 (2013).
- 490 43. Pulikkan, J. A. *et al.* CBF $\beta$ -SMMHC Inhibition Triggers Apoptosis by Disrupting MYC  
491 Chromatin Dynamics in Acute Myeloid Leukemia. *Cell* **174**, 172-186.e21 (2018).
- 492 44. Bahr, C. *et al.* A Myc enhancer cluster regulates normal and leukaemic haematopoietic stem  
493 cell hierarchies. *Nature* **553**, 515–520 (2018).
- 494 45. Dixon, G. *et al.* QSER1 protects DNA methylation valleys from de novo methylation. *Science*  
495 **372**, eabd0875 (2021).
- 496 46. Weinberg, D. N. *et al.* The histone mark H3K36me2 recruits DNMT3A and shapes the  
497 intergenic DNA methylation landscape. *Nature* **573**, 281–286 (2019).

498 47. Thurman, R. E. *et al.* The accessible chromatin landscape of the human genome. *Nature*  
499 **489**, 75 (2012).

500

501

502

503 **Figure 1.** Genome-wide DNA methylation patterns in seven AML mutation groups and normal  
504 CD34+ cells. A) Summary of mutation status in 51 primary AML patients with WGBS data. B)  
505 Average methylation levels across ~28 million CpGs in CD34+ cells (N=6) and AML subtypes  
506 (*IDH1*<sup>mut</sup> or *IDH2*<sup>mut</sup>, n=15; *TET2*<sup>mut</sup>, n=5; *DNMT3A*<sup>R882</sup>, n=6; *DNMT3A*<sup>R882</sup>/*IDH*<sup>mut</sup>, n=7; normal  
507 karyotype with *NPM1c* and wild-type *IDH1*, *IDH2*, *TET2*, and *DNMT3A*, n=4; Normal karyotype  
508 with wild-type *NPM1*, *IDH1*, *IDH2*, *TET2*, and *DNMT3A*, n=4; *CBFB-MYH11*, n=3; *KMT2A-ELL*,  
509 n=3; *RUNX1-RUNX1T1*, n=3). C) Mean CpG island methylation levels in CD34+ cells and AML  
510 subtypes. D) Number of differentially methylated regions (DMRs) identified for each AML  
511 subtype compared with normal CD34+ cells. Blue and red bars represent hypomethylated and  
512 hypermethylated DMRs with respect to normal CD34+ cells, respectively. Mean number of  
513 CpGs per DMR (top panel) and DMR length (bottom panel) are shown for each AML subtype.  
514 E) Mean CpG density across DMRs identified in each AML subtype.

515

516

517 **Figure 2.** Characterization of  $IDH^{mut}$ -specific DMRs. A) Distribution of shared hypermethylated  
518 DMRs across AML subtypes. B) Example of the hierarchical clustering approach used to identify  
519  $IDH^{mut}$ -specific DMRs. Aggregate DMR methylation for individual AML subtypes are shown in  
520 bottom panel with  $IDH$  samples indicated in red and CD34+ cells indicated in blue. C) Mean  
521 DMR methylation across  $IDH^{mut}$ -specific DMRs in  $IDH^{mut}$  samples versus mean methylation of  
522 all other AMLs. D) Aggregate methylation levels across all  $IDH1/2^{mut}$ -specific DMRs in  $IDH^{mut}$   
523 and  $IDH^{wt}$  AML subtypes. E) Locus heatmap showing mean methylation values by group for all  
524  $IDH^{mut}$ -specific DMRs, where each column is centered over the DMR with the window extending  
525 5kb up- or down-stream the DMR center. F) Mean DMR methylation across all  $IDH1/2^{mut}$ -  
526 specific DMRs (rows) in 15 individual  $IDH^{mut}$  cases (columns). G) Aggregate DMR methylation  
527 across 3,928  $IDH1^{mut}$  specific DMRs and 1,821  $IDH2^{mut}$  specific DMRs respectively. H) Fraction  
528 of functional genomic elements overlapping generically hypermethylated DMRs,  $IDH1^{mut}$  specific  
529 DMRs, and  $IDH2^{mut}$  specific DMRs. I) Distribution of CpG densities across generically  
530 hypermethylated regions in primary AML and  $IDH1^{mut}$ - and  $IDH2^{mut}$ -specific DMRs.  
531  
532

533 **Figure 3.** *TET2*<sup>mut</sup> AMLs have modest hypermethylation that overlaps *IDH*<sup>mut</sup>-specific DMRs. A)  
534 Mean DMR methylation across 2512 in *TET2*<sup>mut</sup> DMRs called vs. CD34+ cells (black points) and  
535 52 in *TET2*<sup>mut</sup>-specific DMRs (red points) in *TET2* mutant samples versus mean methylation in  
536 all other AMLs. B) Intersection of in *TET2*<sup>mut</sup>-specific and *IDH*<sup>mut</sup>-specific DMRs. C) Aggregate  
537 methylation over *IDH*<sup>mut</sup>-specific DMRs in *IDH*<sup>mut</sup> and in *TET2*<sup>mut</sup> AML and CD34+ cells. D)  
538 Locus heatmap of mean methylation values for all *IDH*<sup>mut</sup>-specific DMRs (rows), where each  
539 column is centered over the DMR with the window extending 5kb up- and down-stream the  
540 DMR center point. E) Mean 5hmC (WGBS minus oxWGBS) levels in in *TET2*<sup>mut</sup> and in *TET2*<sup>wt</sup>  
541 AML samples at 4650 ChromHMM heterochromatic regions, 4586 generically hypermethylated  
542 regions, and 4008 *IDH*<sup>mut</sup>-specific hypermethylated DMRs.  
543  
544



545 **Figure 4.** *DNMT3A*<sup>R882</sup>/*IDH*<sup>mut</sup> double mutant AMLs display an attenuated focal  
546 hypermethylation phenotype. A) Locus heatmap of mean methylation at *IDH*<sup>mut</sup> DMRs (rows) in  
547 *IDH1* or *IDH2* mutant, *DNMT3A*<sup>R882</sup>/*IDH*<sup>mut</sup> double mutant, and *DNMT3A*<sup>R882</sup> AMLs, and CD34+  
548 cells. B) Distribution of *IDH*<sup>mut</sup>-specific DMR methylation levels by AML subtype. C) Example  
549 *IDH*<sup>mut</sup>-specific DMR locus within the *ETV6* gene demonstrating an intermediate methylation  
550 phenotype of double mutant samples with respect to *IDH*<sup>mut</sup> and *DNMT3A*<sup>R882</sup> mutant AMLs. D)  
551 Methylation locus heatmap of average subtype methylation across *DNMT3A*<sup>R882</sup> DMRs called  
552 vs. CD34+ cells in *IDH*<sup>mut</sup>, *DNMT3A*<sup>R882</sup>/*IDH*<sup>mut</sup> double mutant, and *DNMT3A*<sup>R882</sup> AMLs, and  
553 CD34+ cells. E) Distribution of *DNMT3A*<sup>R882</sup> DMR methylation levels by AML subtype. F)  
554 Example *DNMT3A*<sup>R882</sup> DMR locus within the *MLL1* gene, demonstrating the hypomethylation  
555 phenotype of *DNMT3A*<sup>R882</sup> mutant samples with respect to *IDH*<sup>mut</sup> and *DNMT3A*<sup>R882</sup>/*IDH*<sup>mut</sup>  
556 double mutant AML samples.  
557  
558

559 **Figure 5.** *IDH*<sup>mut</sup>-specific DMRs are enriched for putative enhancers. A) Distribution of  
560 ChromHMM chromatin states from CD34+ cells represented in *IDH*<sup>mut</sup>-specific DMRs.  
561 Enrichment of chromatin states within *IDH*<sup>mut</sup>-specific DMRs is shown with respect to the  
562 frequency of states overlapping regions of common CpG island hypermethylation. B) Enhancer-  
563 based annotation of common hypermethylated regions, *IDH1*<sup>mut</sup>, and *IDH2*<sup>mut</sup> DMRs, where  
564 DMRs intersecting an H3K27ac peak alone or in combination with H3K4me1 constitute active  
565 enhancers, an H3K27ac peak in combination with H3K27me3 constitutes poised enhancers,  
566 and H3K4me1 alone constitutes a weak enhancer profile. C) Examples of intragenic and genic  
567 enhancer regions exhibiting *IDH1*<sup>mut</sup>, *IDH2*<sup>mut</sup>, or *IDH1/2*<sup>mut</sup> hypermethylation compared with  
568 CD34+ cells and other AML subtypes. D) Heatmap of enhancer histone modifications and  
569 heterochromatin modifications over *IDH*<sup>mut</sup>-specific DMRs (left) and generic hypermethylation  
570 (right) in CD34+ cells (N=4 H3K27ac, N=7 H3K3me1, and N=7 H3K27me3), *IDH*<sup>mut</sup> AML (n=3),  
571 and *IDH*<sup>wt</sup> AML samples (N=9 H3K27ac, N=10 H3K3me1, and N=24 H3K27me3). E)  
572 Differential active enhancer signal (H3K27ac) for all AML-associated putative enhancers (black  
573 points) compared to putative enhancers intersecting an *IDH1/2*<sup>mut</sup>-specific DMR (red points). F)  
574 HOMER motif enrichment analysis of *IDH1/2*<sup>mut</sup>-specific DMRs with respect to a background set  
575 of generically hypermethylated regions. G) Enrichment analysis of TF binding events for 445  
576 TFs within *IDH1/2*<sup>mut</sup>-specific DMRs.  
577  
578

579 **Figure 6.** *IDH<sup>mut</sup>*-specific DMRs are enriched in superenhancers and interact with highly  
580 expressed genes in AML. A) Schematic of DMR and enhancer-associated DMRs (eDMR) and  
581 their interaction with target genes based on intersection HiC-defined genome loops. B) Rank  
582 ordered enhancer regions based on H3K27ac signal in a representative *IDH<sup>mut</sup>* AML sample,  
583 annotated by presence of overlapping *IDH<sup>mut</sup>*-specific DMRs (absence of DMRs indicated by  
584 green points, greater than one DMR indicated by orange points) and computationally-defined  
585 ‘superenhancer’ (above red line). Enhancers of specific hematopoietic genes are designated. C)  
586 Distribution of number of *IDH<sup>mut</sup>*-specific DMRs overlapping a set of AML consensus  
587 superenhancers (SEs) from H3K27ac data from 4 primary samples (N=779). D) Distribution of  
588 normalized gene expression values for all expressed genes (orange histogram) and a set of 750  
589 eDMR target genes (blue histogram) in *IDH<sup>mut</sup>* AML samples. E) Example *IDH<sup>mut</sup>* -eDMR locus  
590 displaying interactions with the *MYC* promoter. A zoomed in view of the locus demonstrates  
591 focal enhancer hypermethylation in *IDH1<sup>mut</sup>* (purple) and *IDH2<sup>mut</sup>* (green) samples compared  
592 with CD34+ cells (blue). Normalized *MYC* expression is shown for 17 CD34+ cord blood cell  
593 samples, 6 and 14 *IDH1<sup>mut</sup>* and *IDH2<sup>mut</sup>* samples, and 91 *IDH<sup>wt</sup>* samples. F) Example *IDH<sup>mut</sup>*-  
594 DMR locus in a candidate enhancer that displays robust interactions with the *ETV6* promoter. A  
595 zoomed in locus view demonstrates focal enhancer hypermethylation in *IDH1<sup>mut</sup>* (purple) and  
596 *IDH2<sup>mut</sup>* (green) samples compared with CD34+ cells (blue). Normalized *ETV6* expression is  
597 shown for CD34+ cells, *IDH1<sup>mut</sup>* and *IDH2<sup>mut</sup>* samples, and *IDH<sup>wt</sup>* samples (see E for sample  
598 sizes).

**Figure 1.**

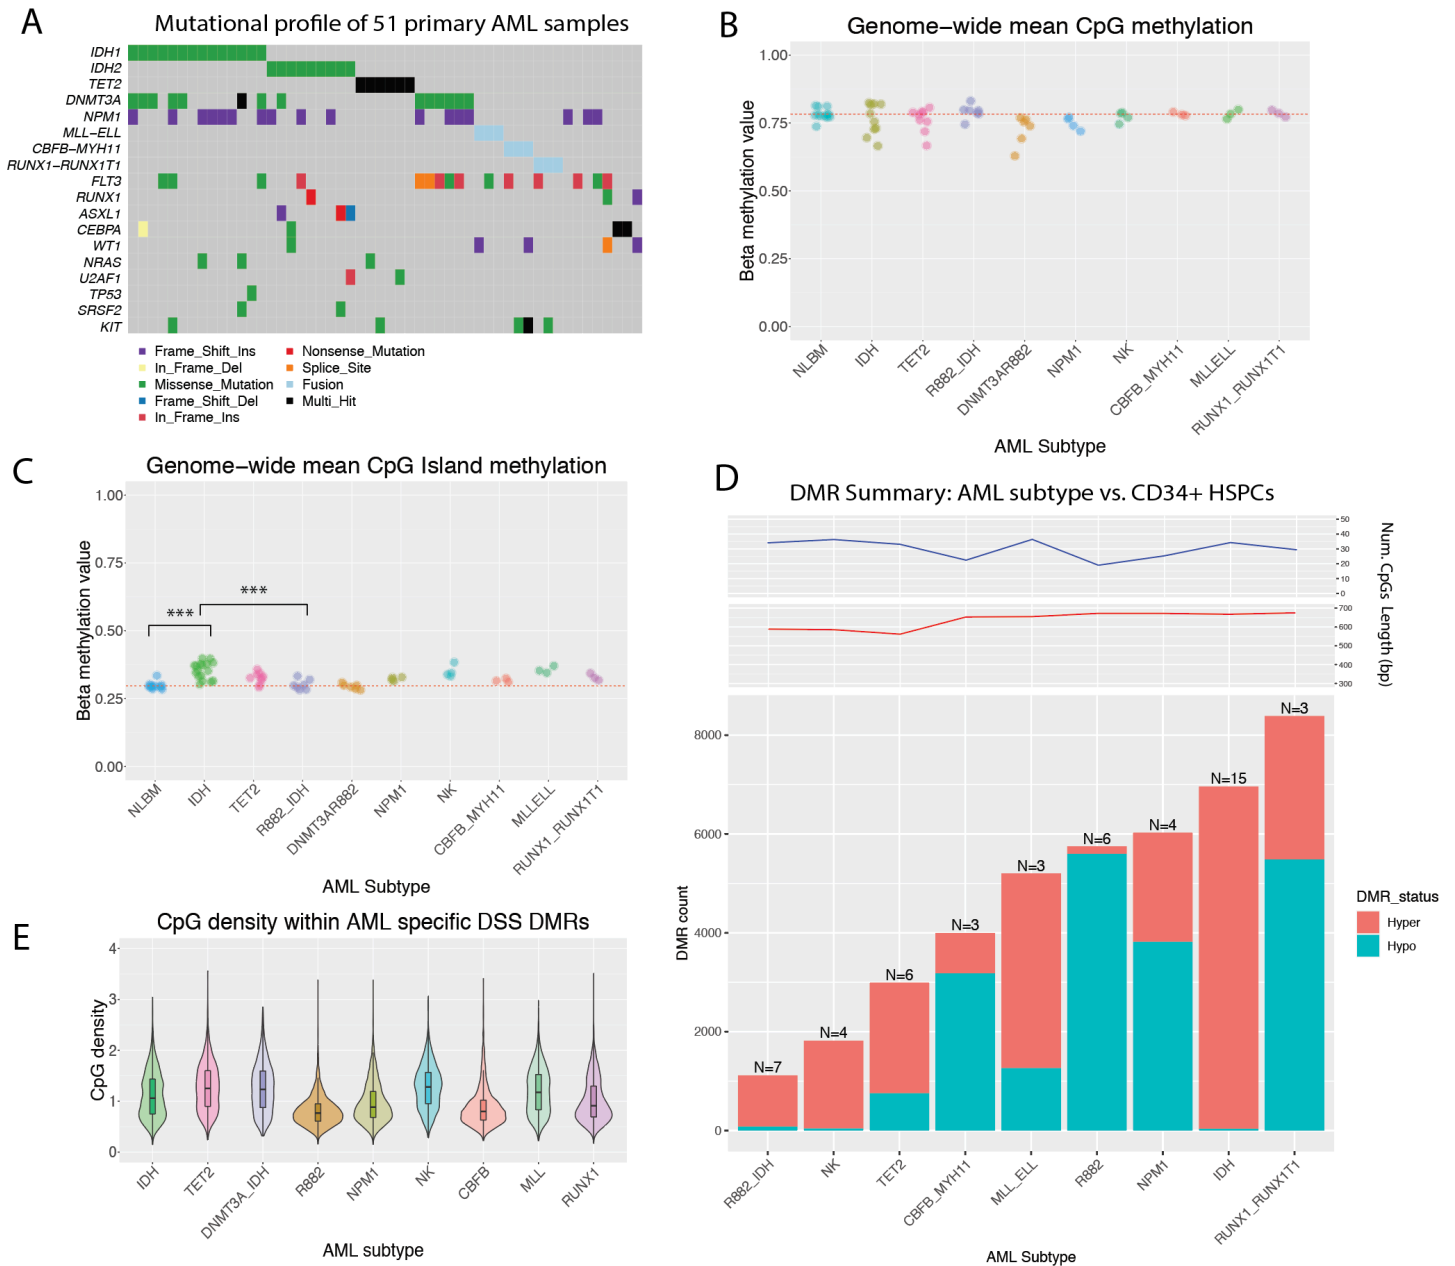

**Figure 2.**

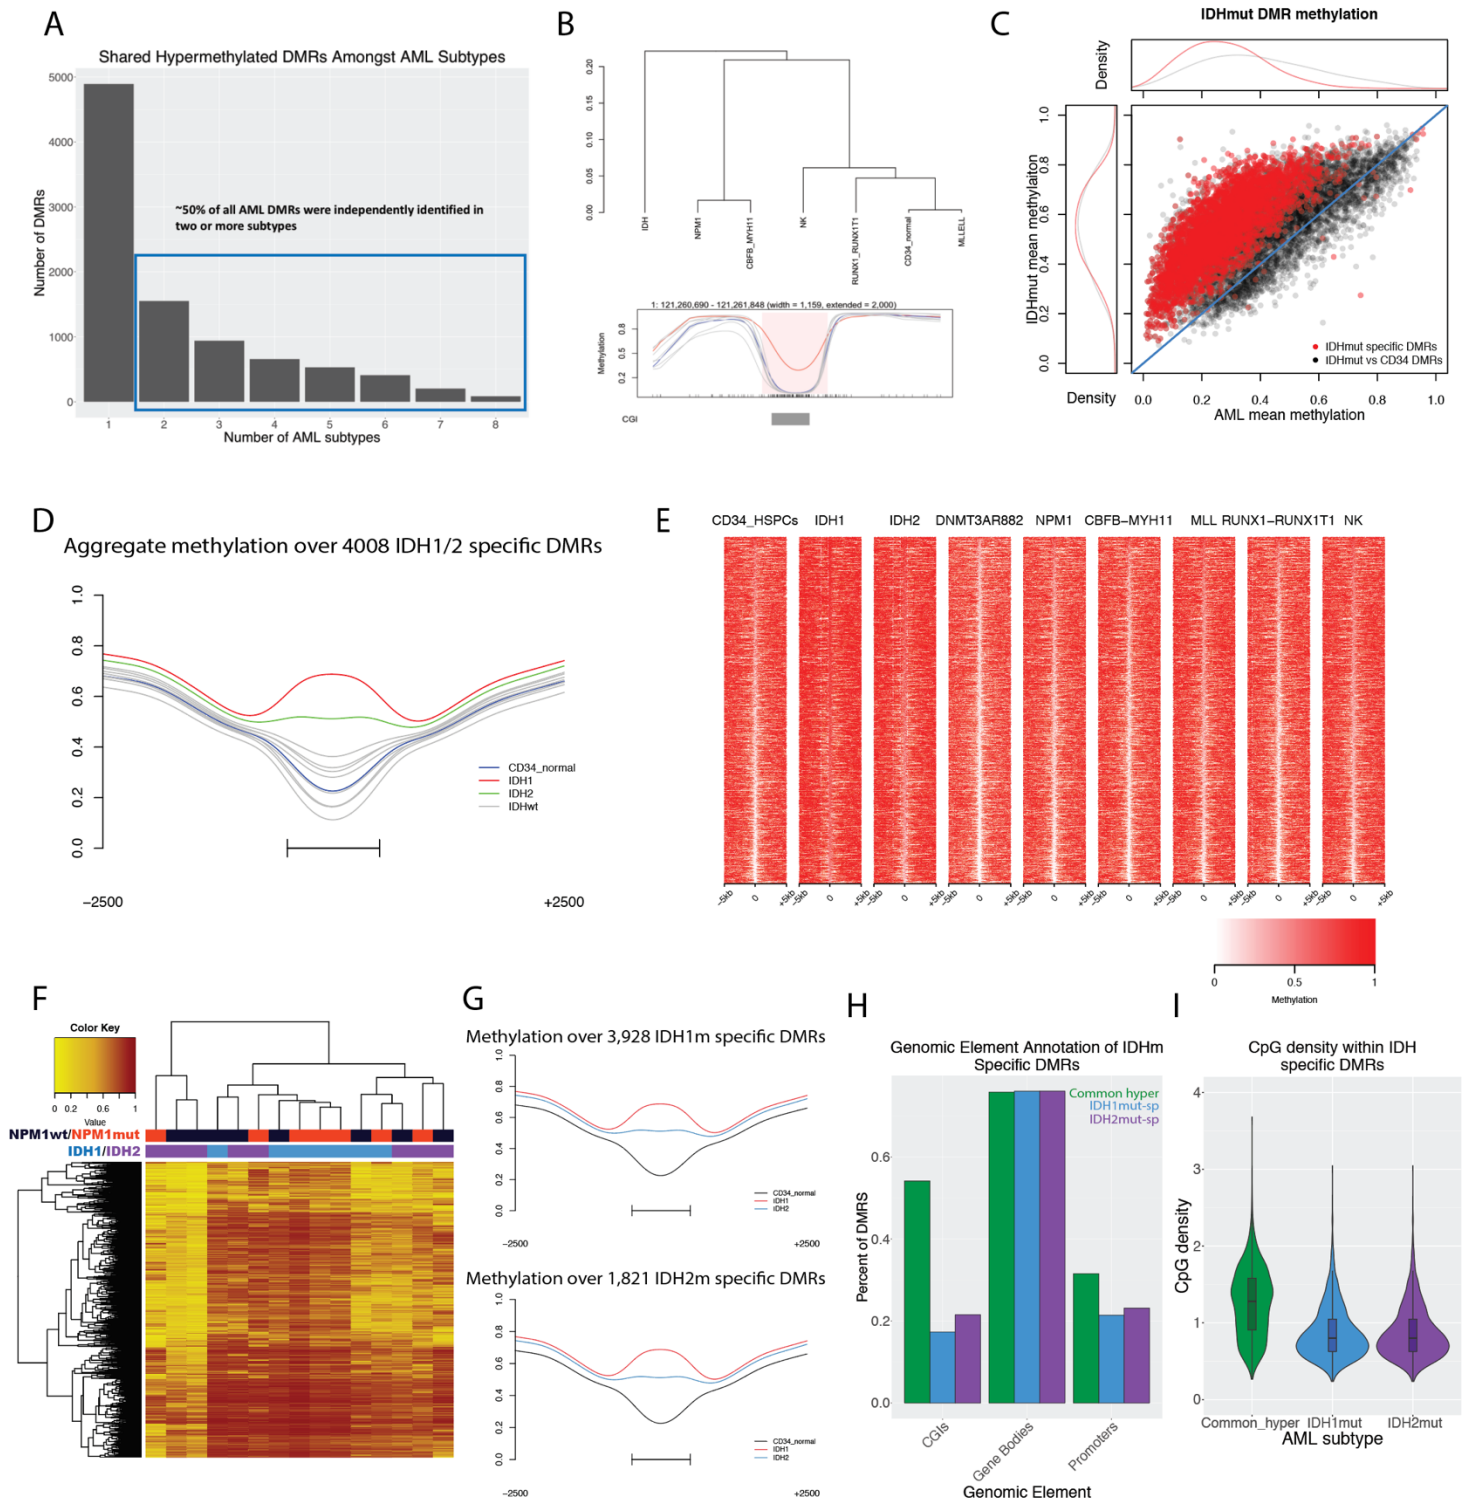

**Figure 3.**

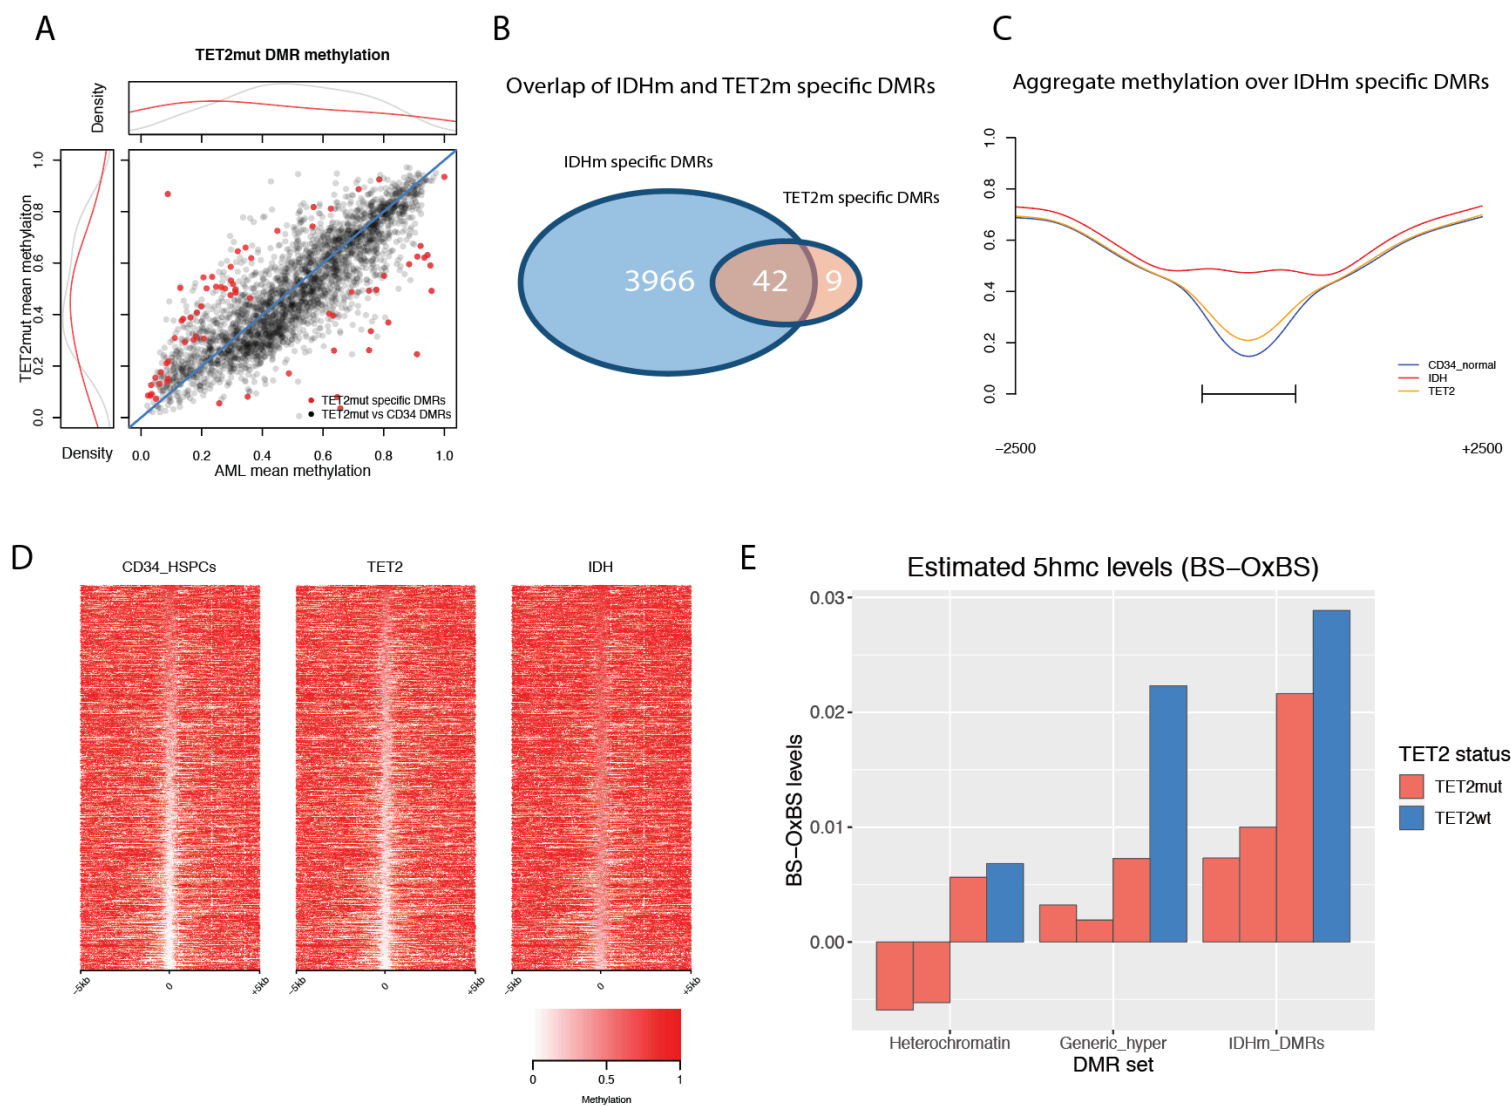



**Figure 4.**

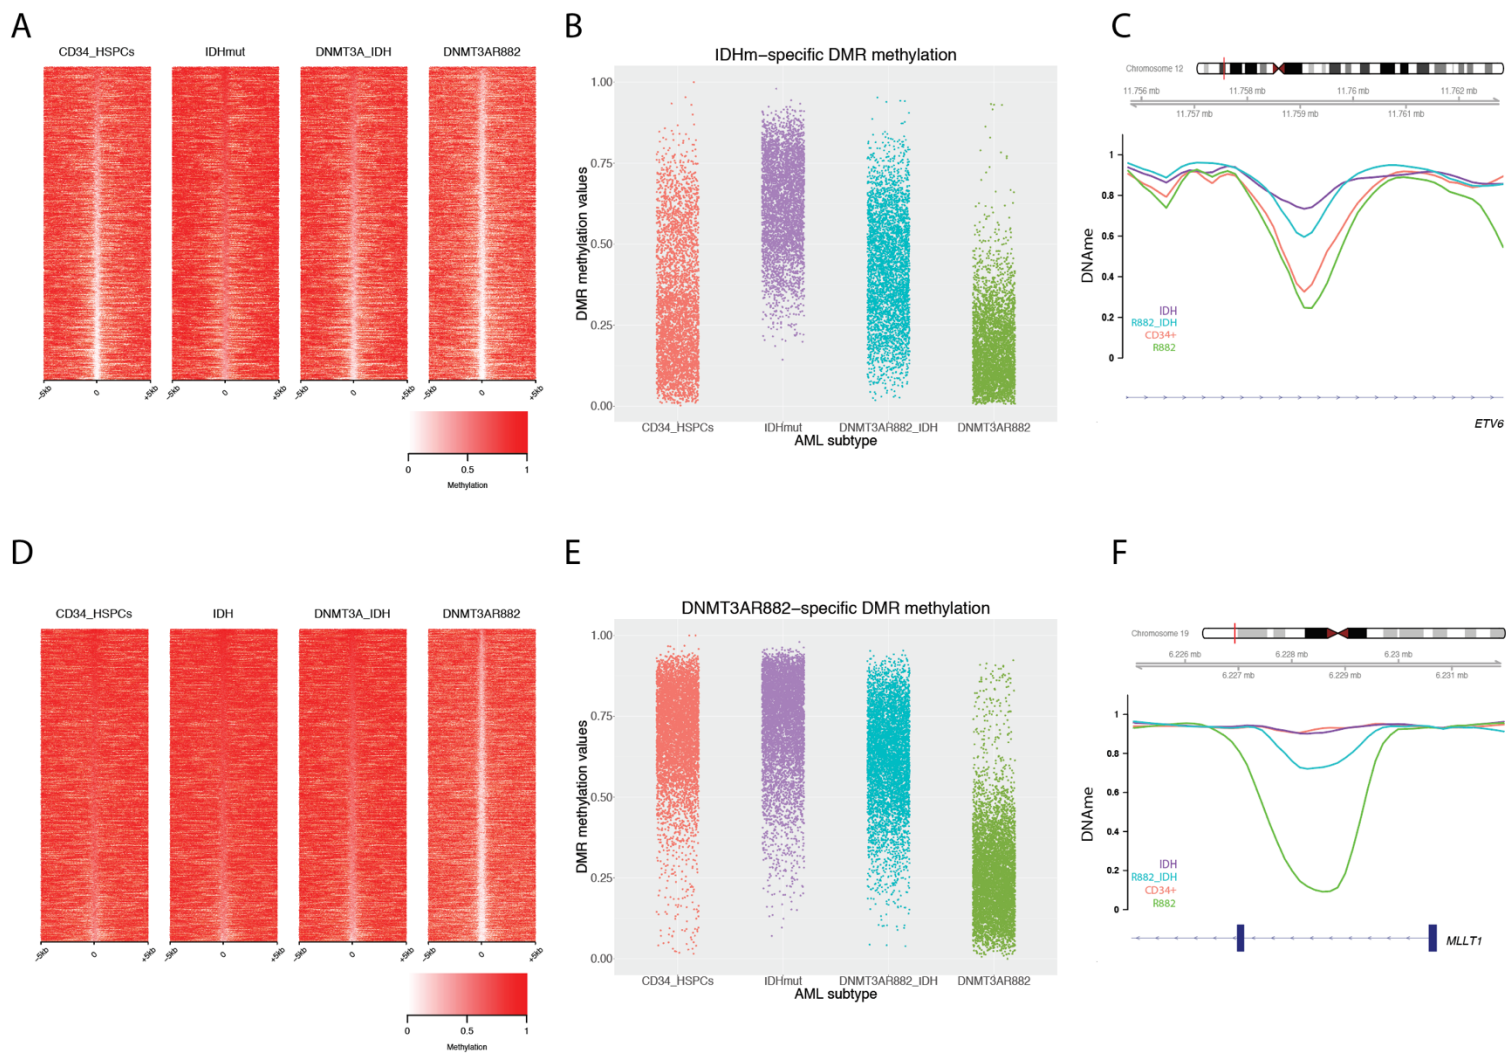

**Figure 5.**

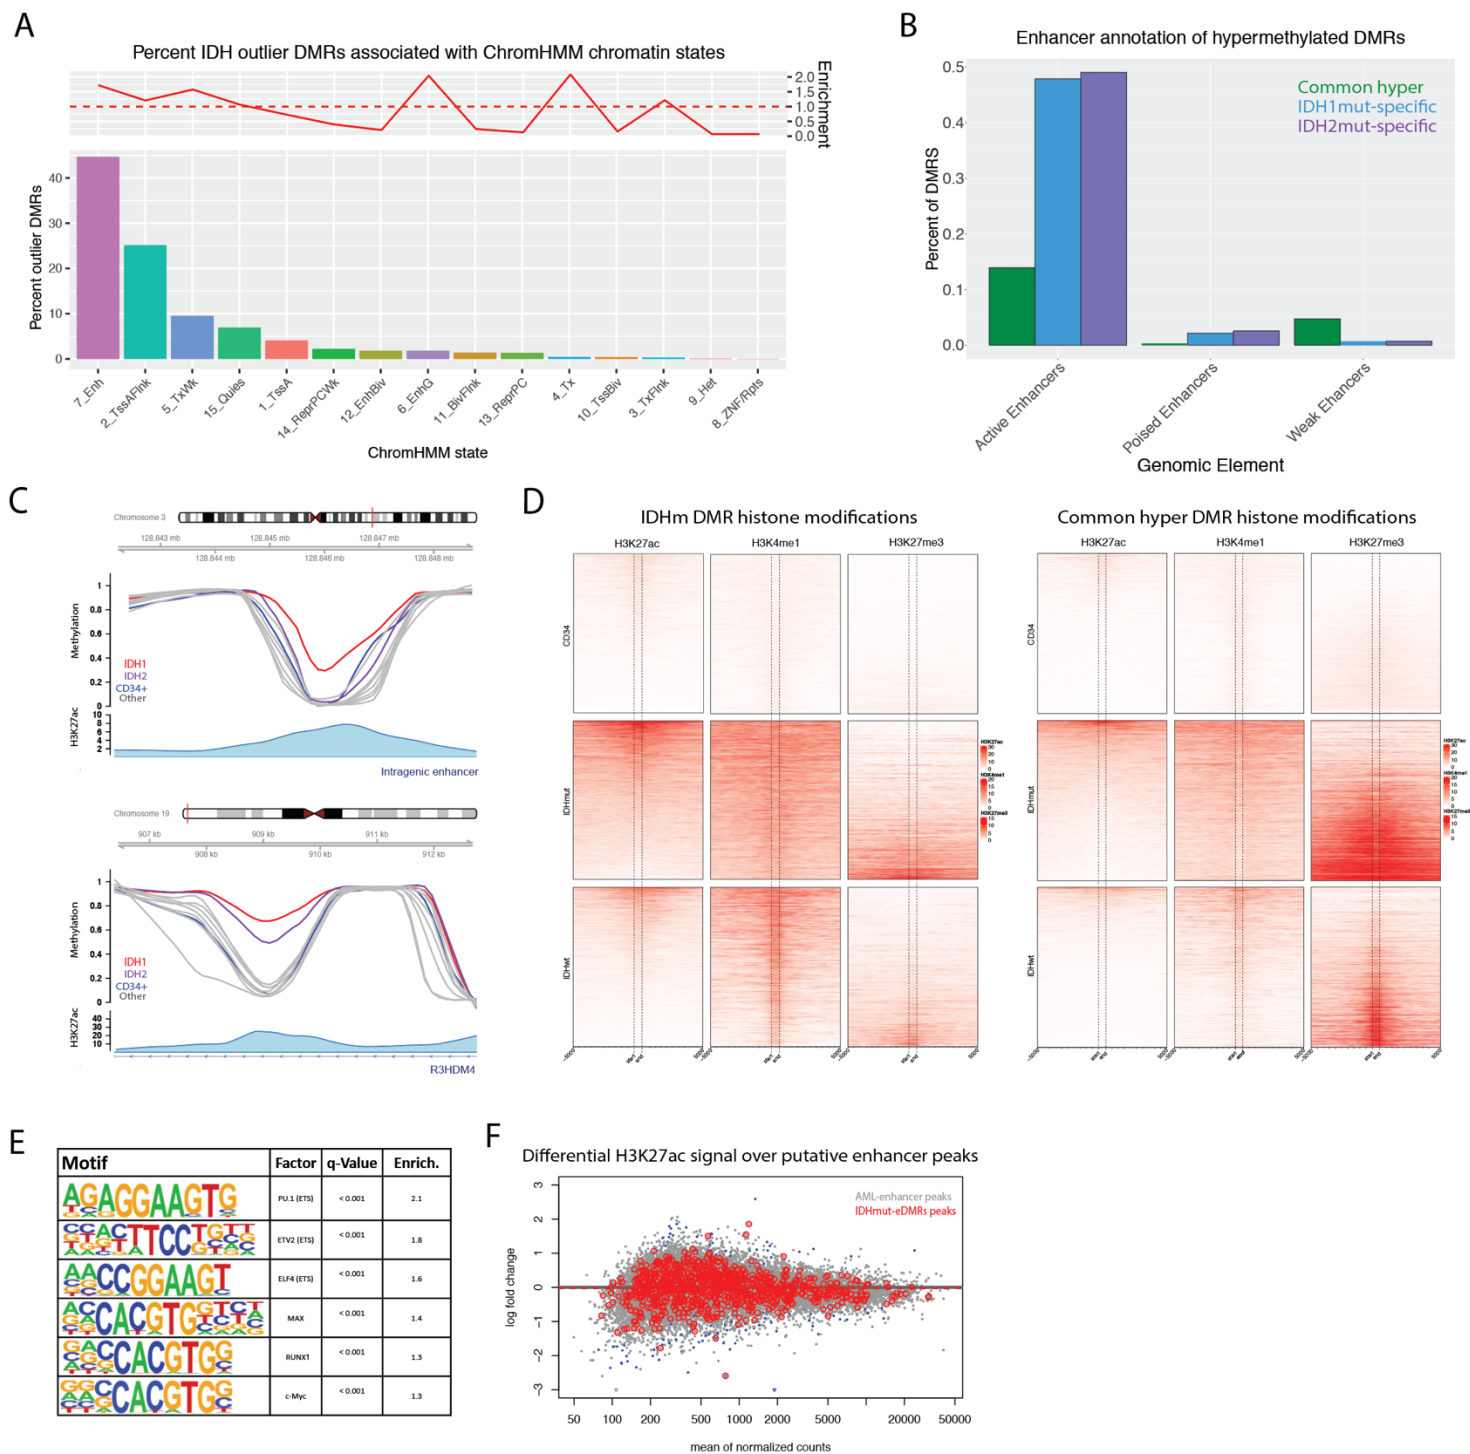



**Figure 6.**

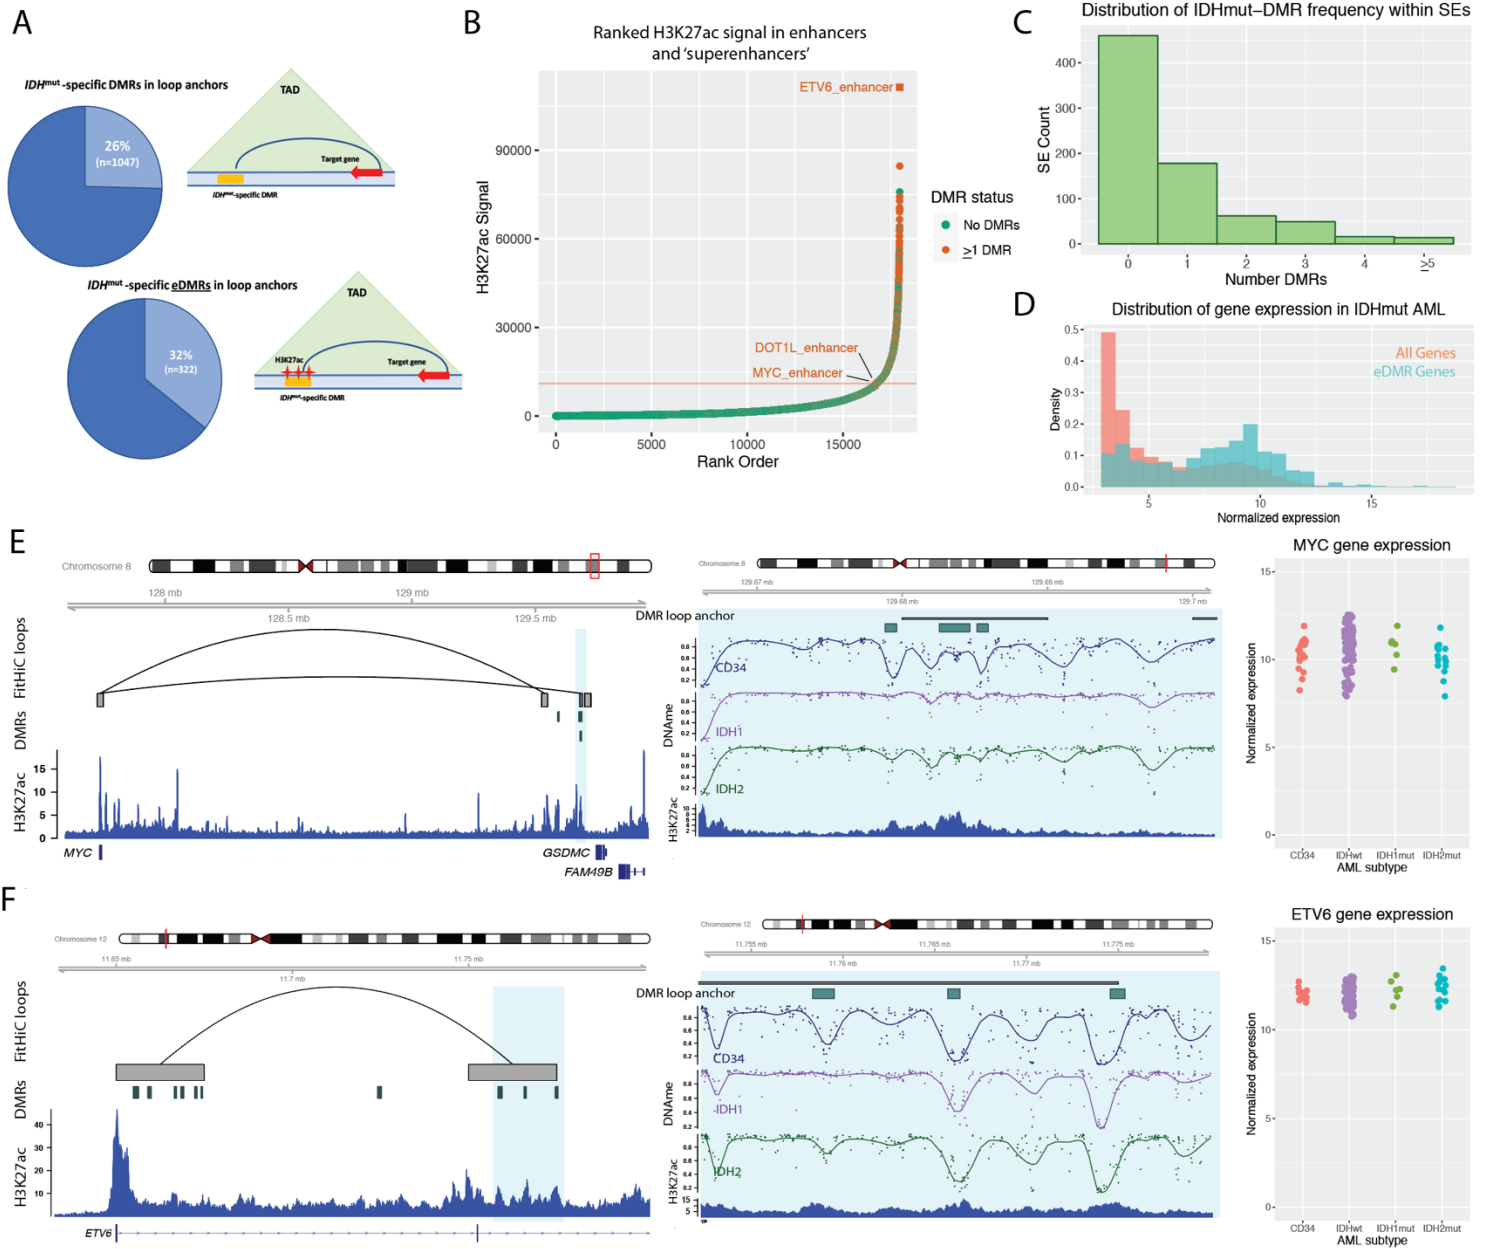

Source: https://www.biorxiv.org/content/biorxiv/early/2021/05/26/2021.03.03.433799.full.pdf
